# Supplementary material for: Protein profiling identified key chemokines that regulate the maintenance of human pluripotent stem cells
Source: PubMed Central journal article supplement (PMC5674019; doi:10.1038/s41598-017-15081-6), 2017-11-06
Supplement: 41598_2017_15081_MOESM1_ESM.pdf [file 41598_2017_15081_MOESM1_ESM.pdf]

**Protein profiling identified key chemokines that regulate the maintenance of human pluripotent stem cells**

Zongmin Jiang<sup>1,2\*</sup>, Yonggang Li<sup>3\*</sup>, Xinglai Ji<sup>2,4</sup>, Yiyuli Tang<sup>2,4</sup>, Haijing Yu<sup>1,2</sup>, Lei Ding<sup>1,2</sup>, Min Yu<sup>1,2</sup>, Qinghua Cui<sup>1,2</sup>, Ming Zhang<sup>5</sup>, Yanping Ma<sup>3#</sup>, Meizhang Li<sup>1,2#</sup>

<sup>1</sup>Laboratory of Biochemistry and Molecular Biology, School of Life Sciences, Yunnan University, Kunming, Yunnan 650091, CHINA.

<sup>2</sup>Key Laboratory of Molecular Cancer Biology, Yunnan Education Department, Kunming, Yunnan 650091, CHINA

<sup>3</sup>Department of Reproduction and Genetics, the First People's Hospital of Yunnan Province, Kunming, Yunnan 650032, CHINA.

<sup>4</sup>State Key Laboratory for Conservation and Utilization of Bio-Resources in Yunnan, Yunnan University, Kunming, Yunnan 650091, CHINA.

<sup>5</sup>Yunnan Key Laboratory of Stem Cell and Regenerative Medicine, Institute of Molecular and Clinical Medicine, Kunming Medical University, Kunming, Yunnan 650500, CHINA

\*Equal contribution

#Correspondence to: Yanping MA, Email: mayanpinghome@163.com. Department of Reproduction and Genetics, First People's Hospital of Yunnan Province, Kunming, Yunnan 650032, China; Or Meizhang LI, Email: mzhli@ynu.edu.cn. Laboratory of Biochemical and Molecular Biology, School of Life Sciences, Yunnan University, Kunming, Yunnan 650091, China.

# Supplemental figures

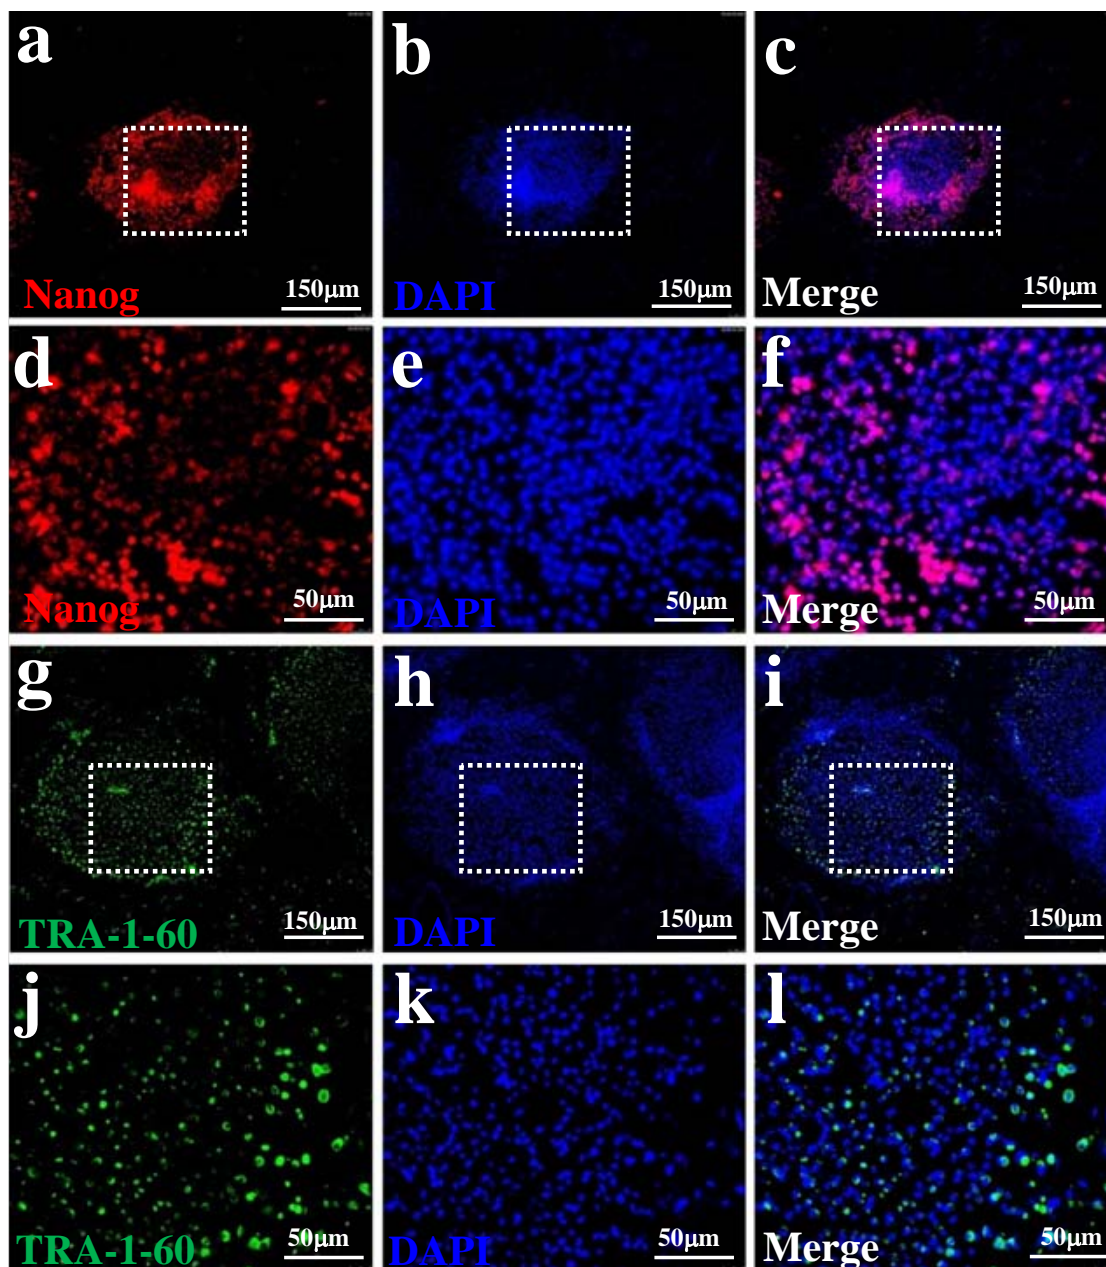

**Figure S1. Protein expressions of Nanog and TRA-1-60 on hESCs cultured on feeder layers in KSR medium. (a-l) Immunostaining of pluripotency markers Nanog and TRA-1-60 in hESCs-derived clones. Nanog (a, d); TRA-1-60 (g, j); DAPI (b, e, h, k); and Merge (c, f, i, l). Scale bars, 150  $\mu\text{m}$  (a-c, g-i) and 50  $\mu\text{m}$  (d-f, j-l).**

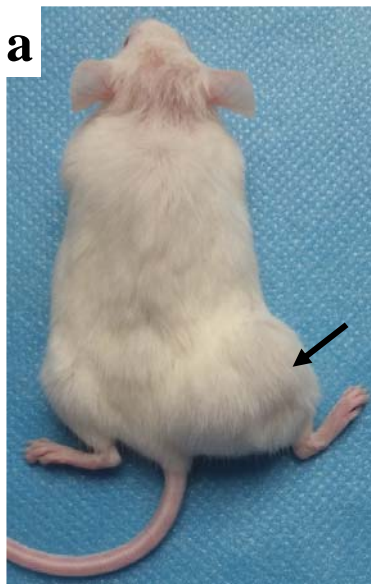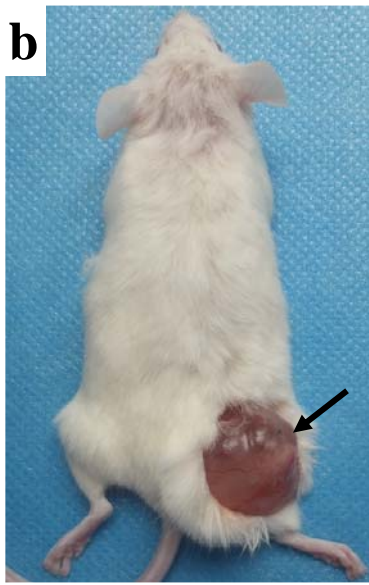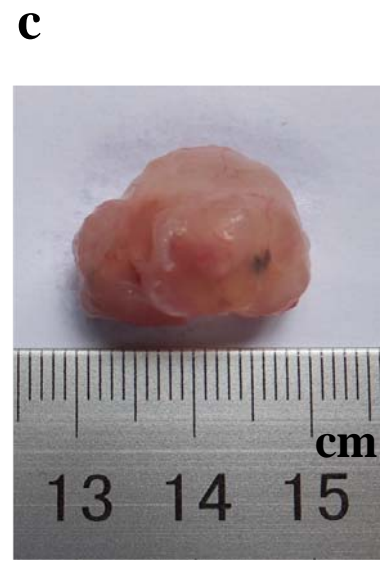

**Endoderm**

**Mesoderm**

**Ectoderm**

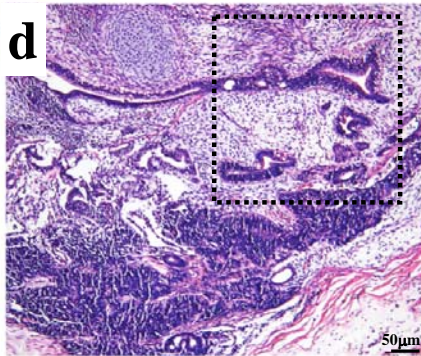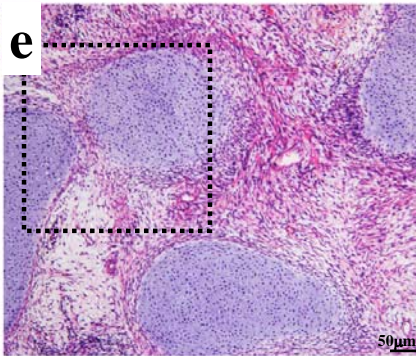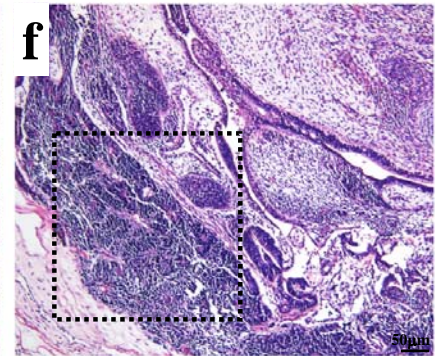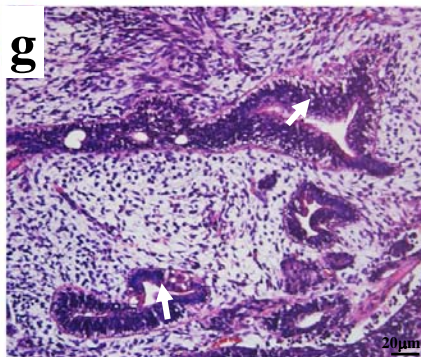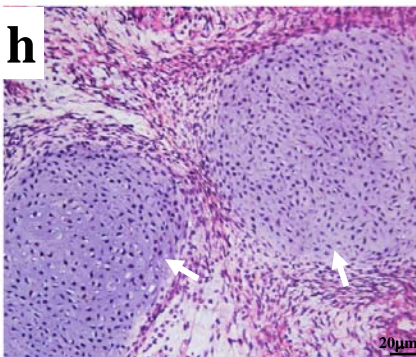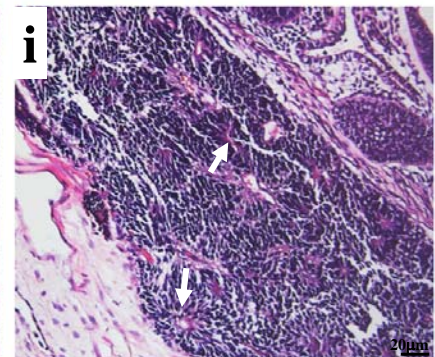

**Figure S2. Differentiation of three germ layers of hESCs *in vivo*.** (a-c) Teratomas (arrows) formed after hESCs were subcutaneously transplanted into NOD SCID mice for seven weeks. (d-h) Histopathological analysis of three germ layers of teratoma derived from hESCs by hematoxylin and eosin staining. Endoderm (d, g); mesoderm (e, h); ectoderm (f, i). Scale bars, 50 μm (d, e, f) and 20 μm (g, h, i).

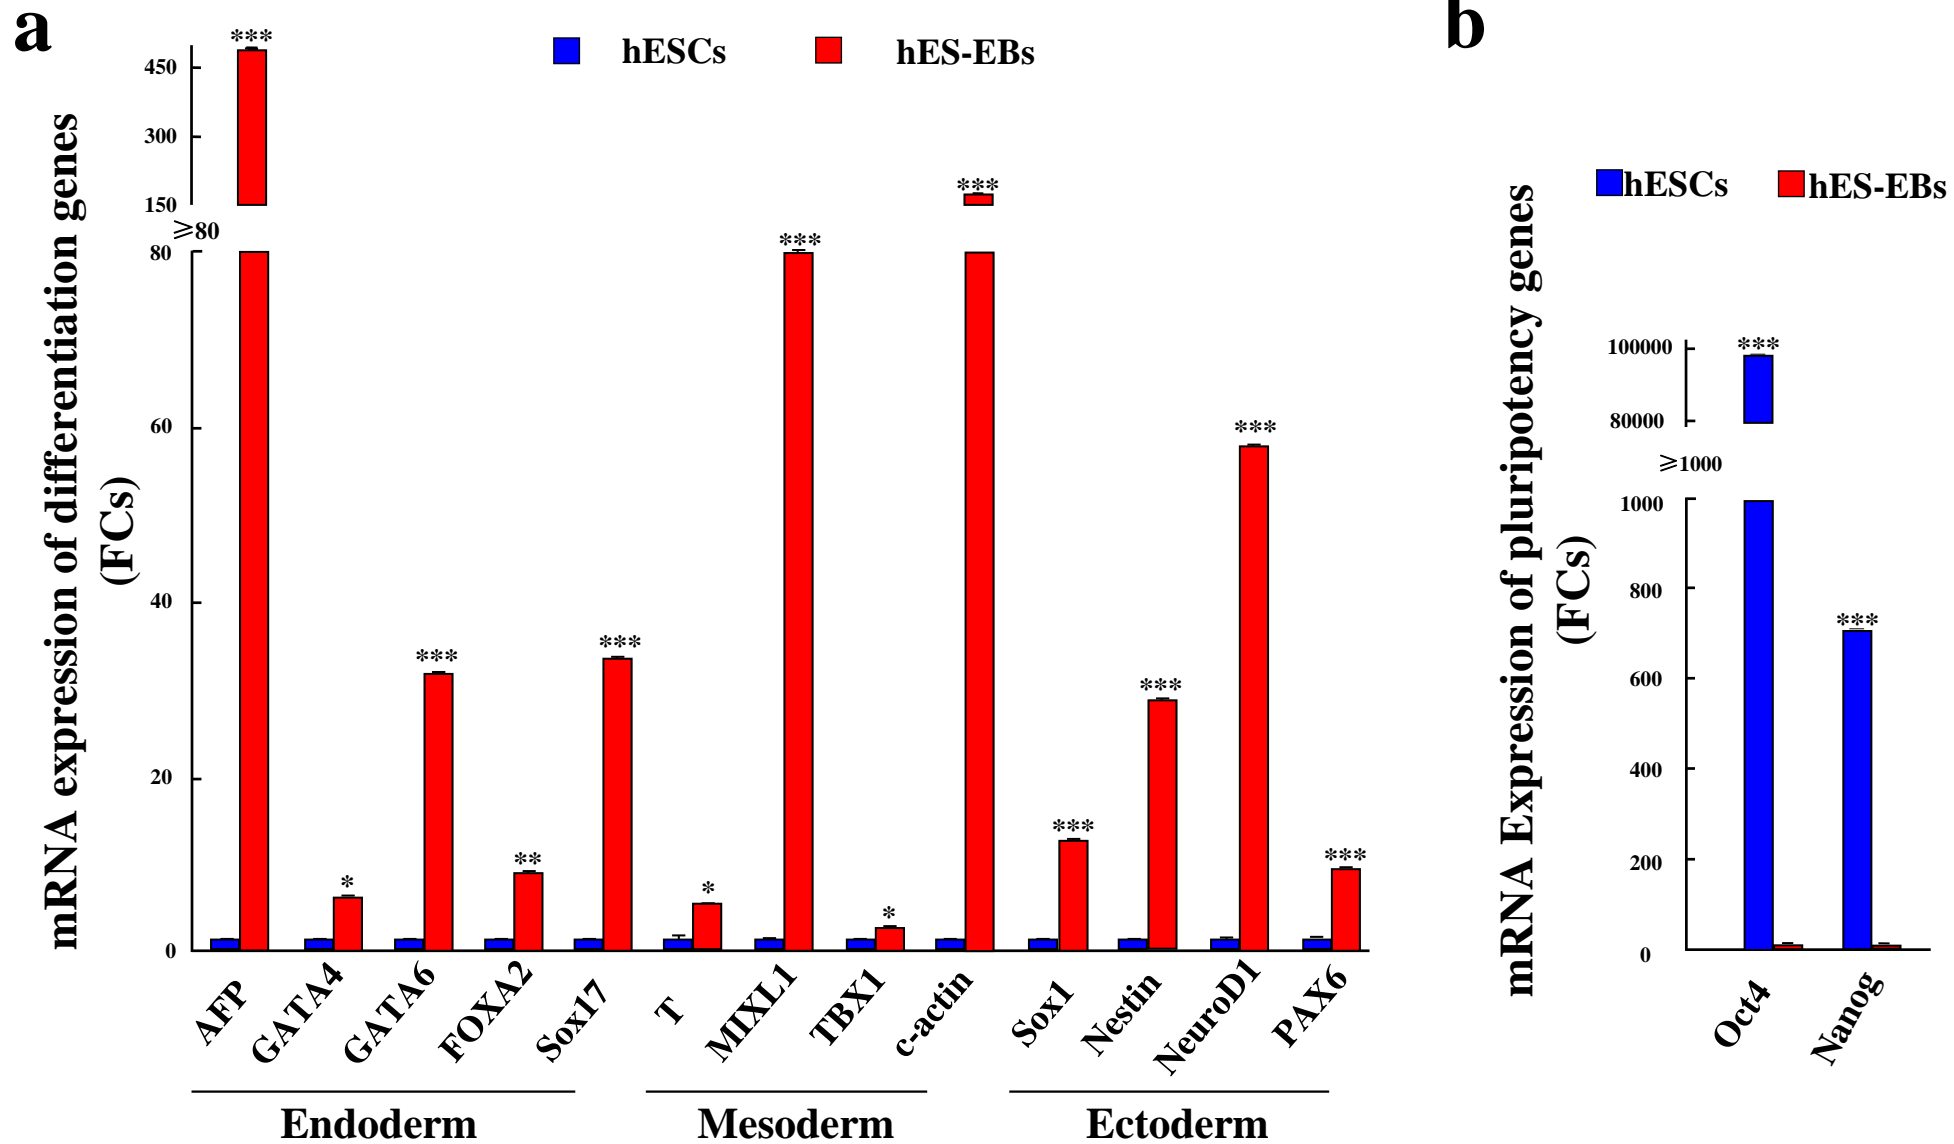

**Figure S3. Quantitative PCR analysis of three germ layers and pluripotency gene markers in hESC-derived embryonic bodies (EBs).** (a) *AFP*, *GATA4*, *GATA6*, *FOXA2*, and *Sox17* (endoderm); *T*, *MIXL1*, *TBX1*, and *c-actin* (mesoderm); *Sox1*, *Nestin*, *NeuroD1*, and *PAX6* (ectoderm). (b) *Oct4* and *Nanog*. Values on graphs represent means  $\pm$  sem,  $n \geq 3$  individual experiments. \* $P < 0.05$ , \*\* $P < 0.01$ , \*\*\* $P < 0.001$ .

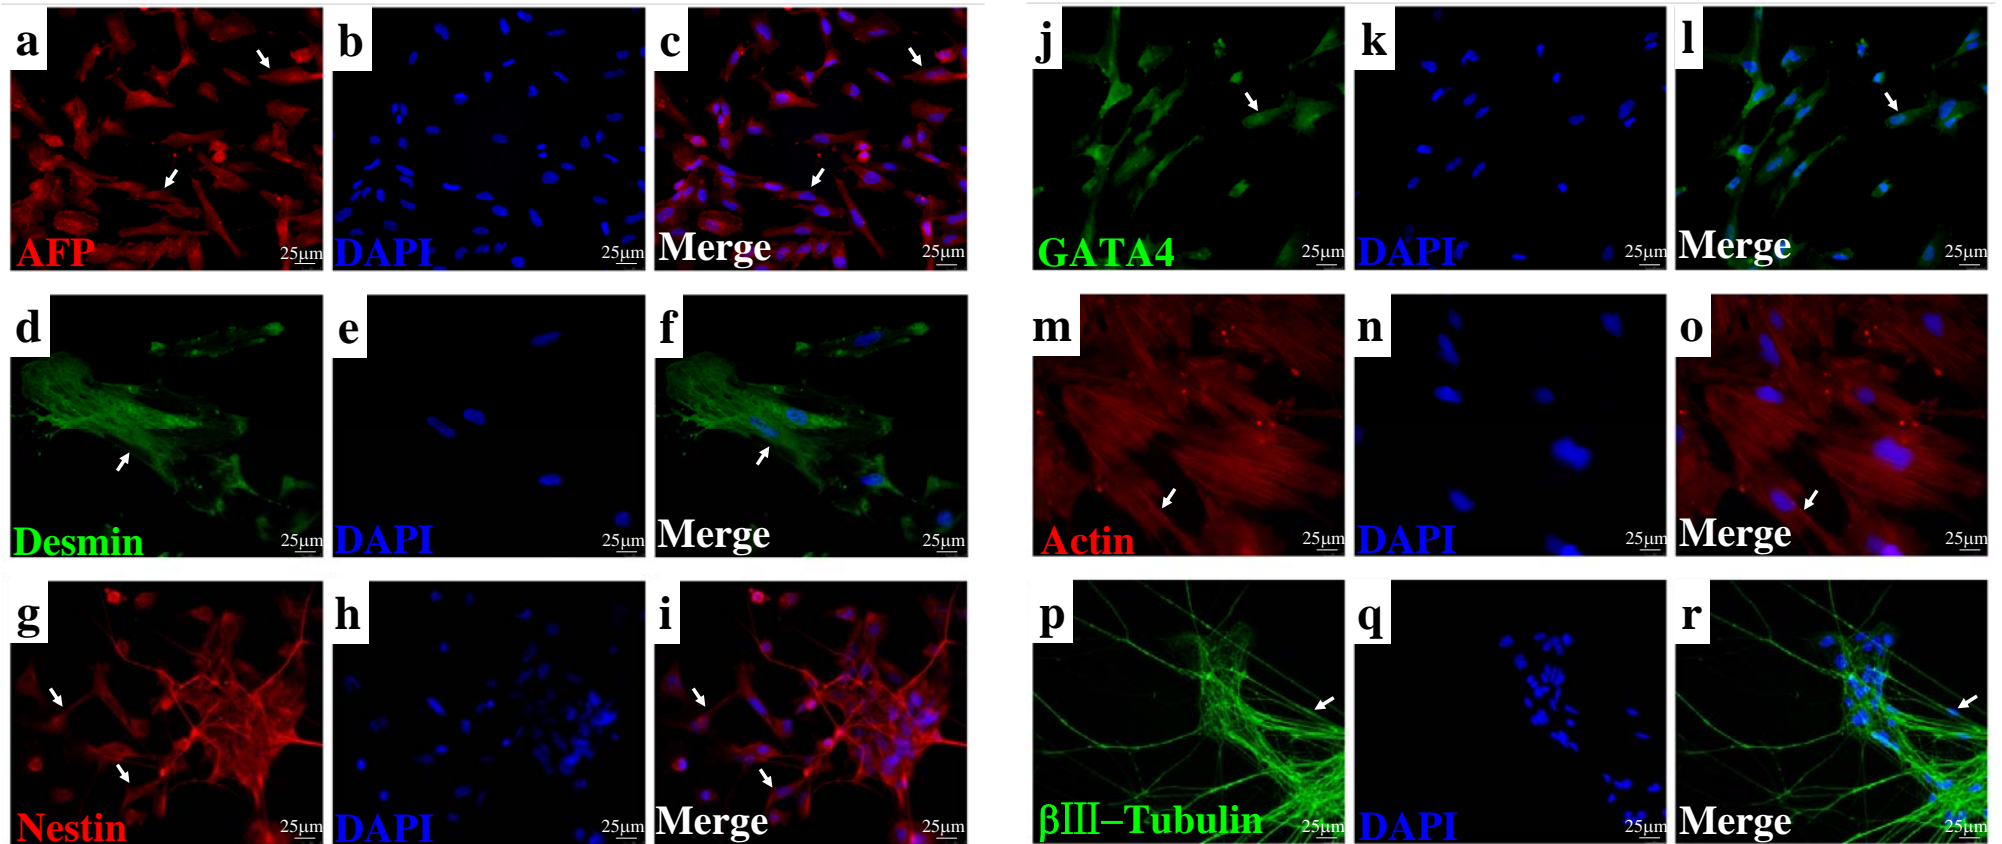

**Figure S4. Immunostaining of three germ layer protein markers in EBs.** (a-r) Endoderm (AFP, a-c and GATA4, j-l); Ectoderm (desmin, d-f and actin, m-o); Ectoderm (nestin, g-i and  $\beta$ -III tubulin, p-r). Cells were counterstained by DAPI. Scale bar, 25  $\mu$ m.

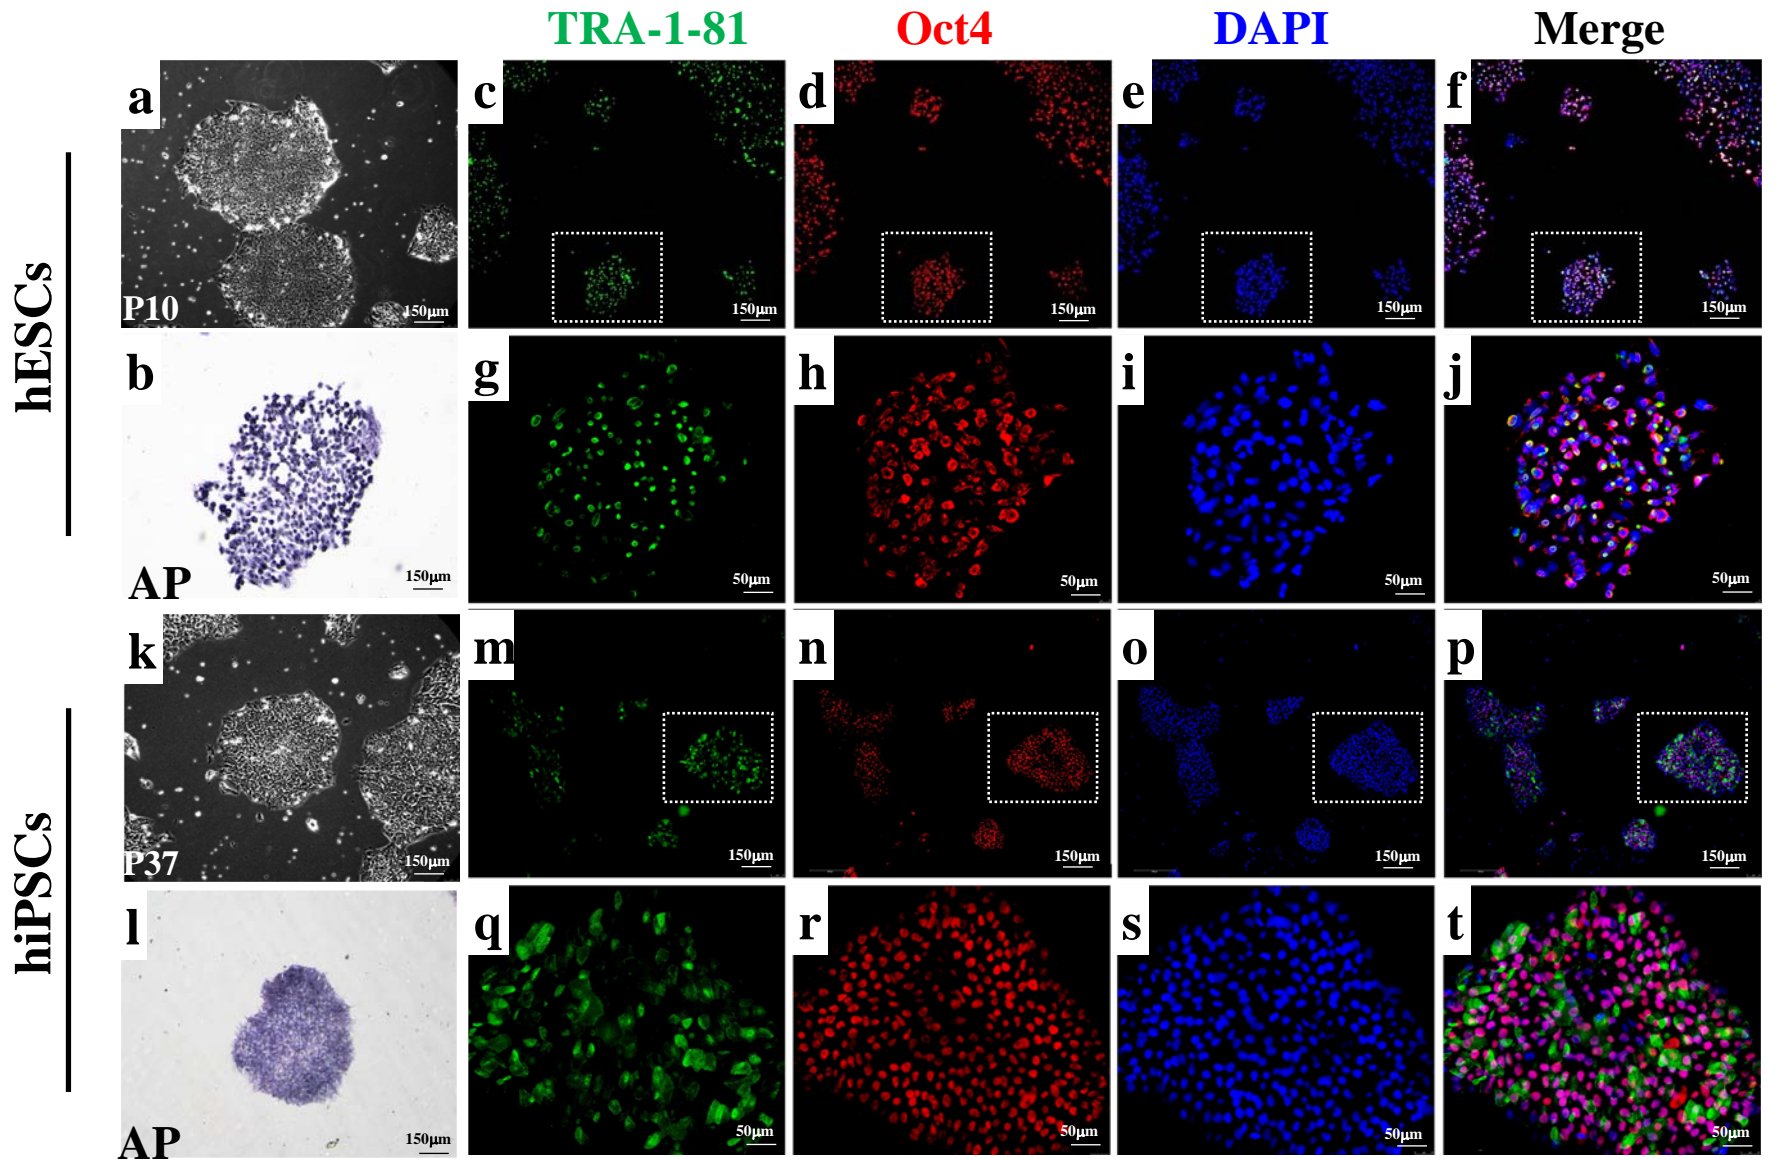

**Figure S5. Maintenance of hESCs and hiPSCs in mTeSR1 medium.** (a-j) hESC-derived clones. Scale bar, 150 μm. (k-t) hiPSC-derived clones. Both hESCs and hiPSCs were cultured in mTeSR1 medium. TRA-1-81 (c, g, m, q); Oct4 (d, h, n, r); DAPI (e, i, o, s); and Merge (f, j, p, t). Scale bars, 150 μm (c-f, m-p) and 50 μm (g-j, q-t).

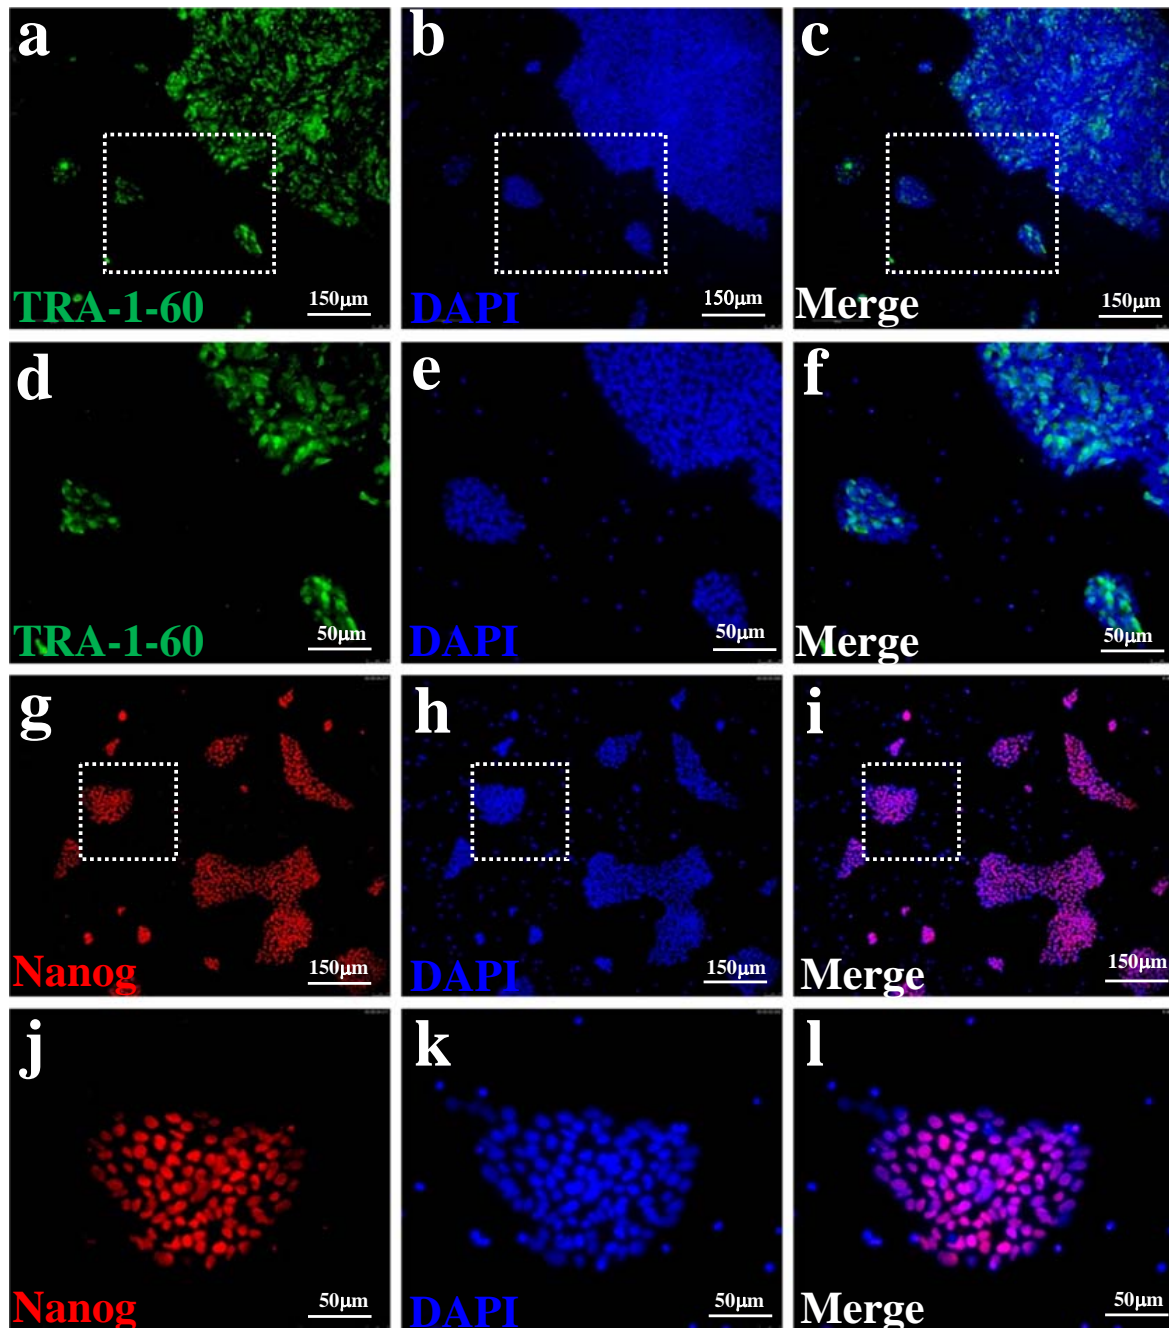

**Figure S6. Protein expressions of Nanog and TRA-1-60 in hESCs cultured in mTeSR1 medium. (a-l) Immunostaining of pluripotency markers Nanog and TRA-1-60 in hESCs-derived clones. Nanog (a, d); TRA-1-60 (g, j); DAPI (b, e, h, k); and Merge (c, f, i, l). Scale bars, 150  $\mu\text{m}$  (a-c, g-i) and 50  $\mu\text{m}$  (d-f, j-l).**

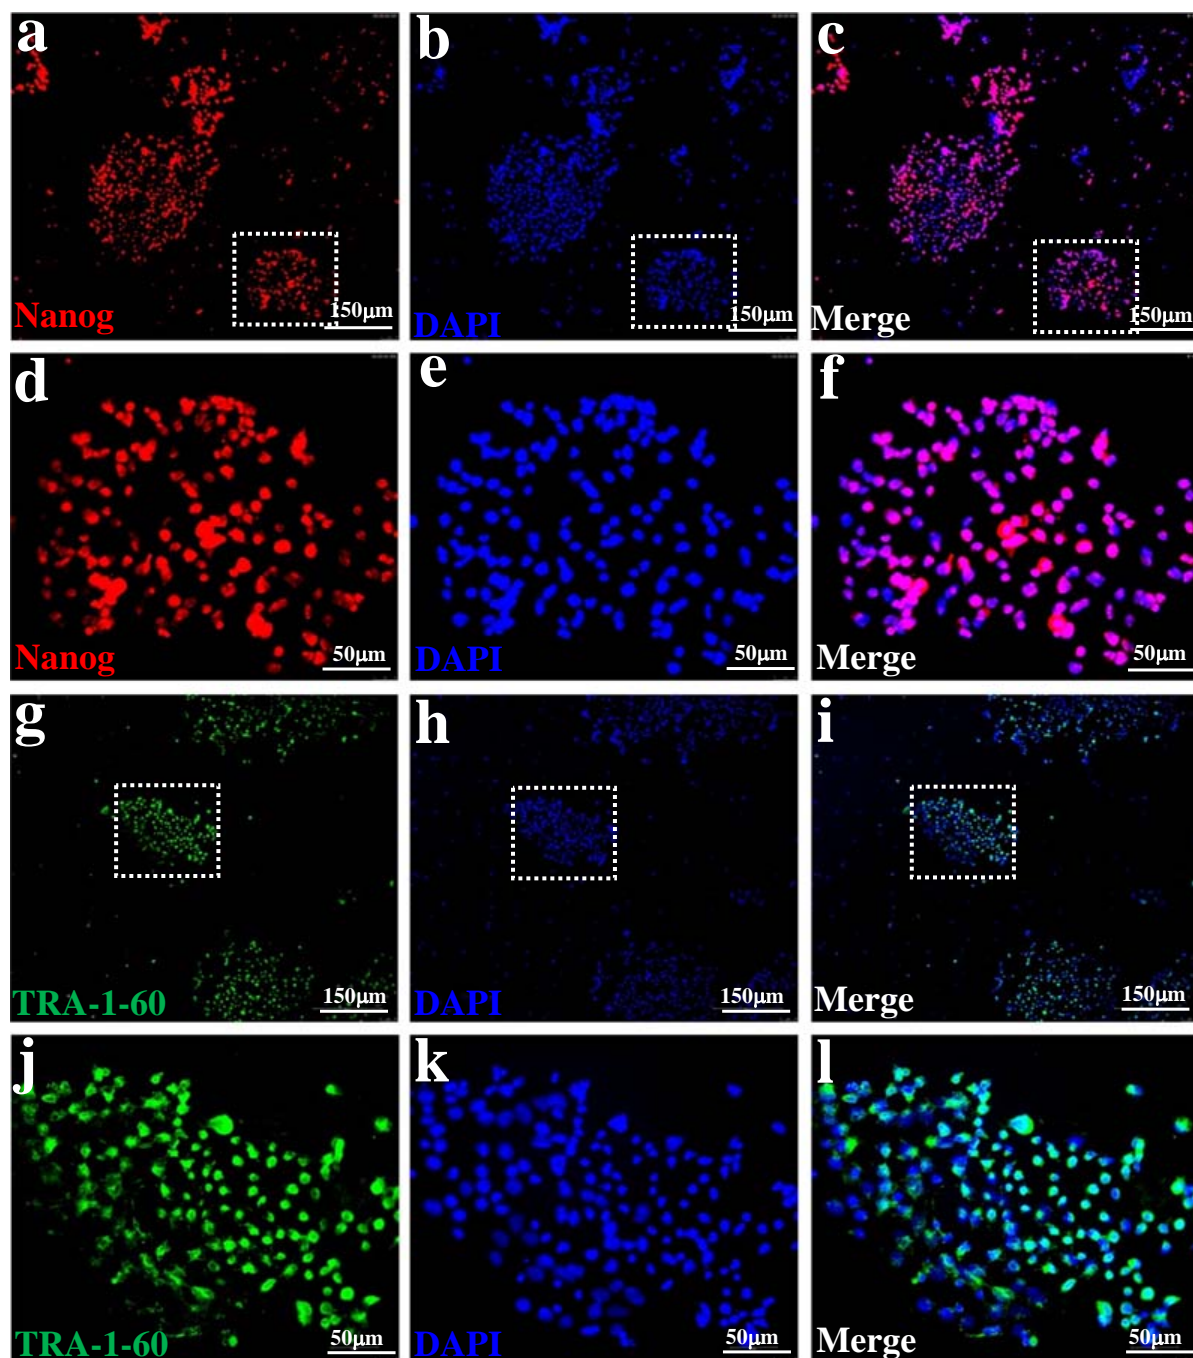

**Figure S7. Protein expressions of Nanog and TRA-1-60 in hiPSCs cultured in mTeSR1 medium. (a-l) Immunostaining of pluripotency markers Nanog and TRA-1-60 in hESCs-derived clones. Nanog (a, d); TRA-1-60 (g, j); DAPI (b, e, h, k); and Merge (c, f, i, l). Scale bars, 150  $\mu\text{m}$  (a-c, g-i) and 50  $\mu\text{m}$  (d-f, j-l).**



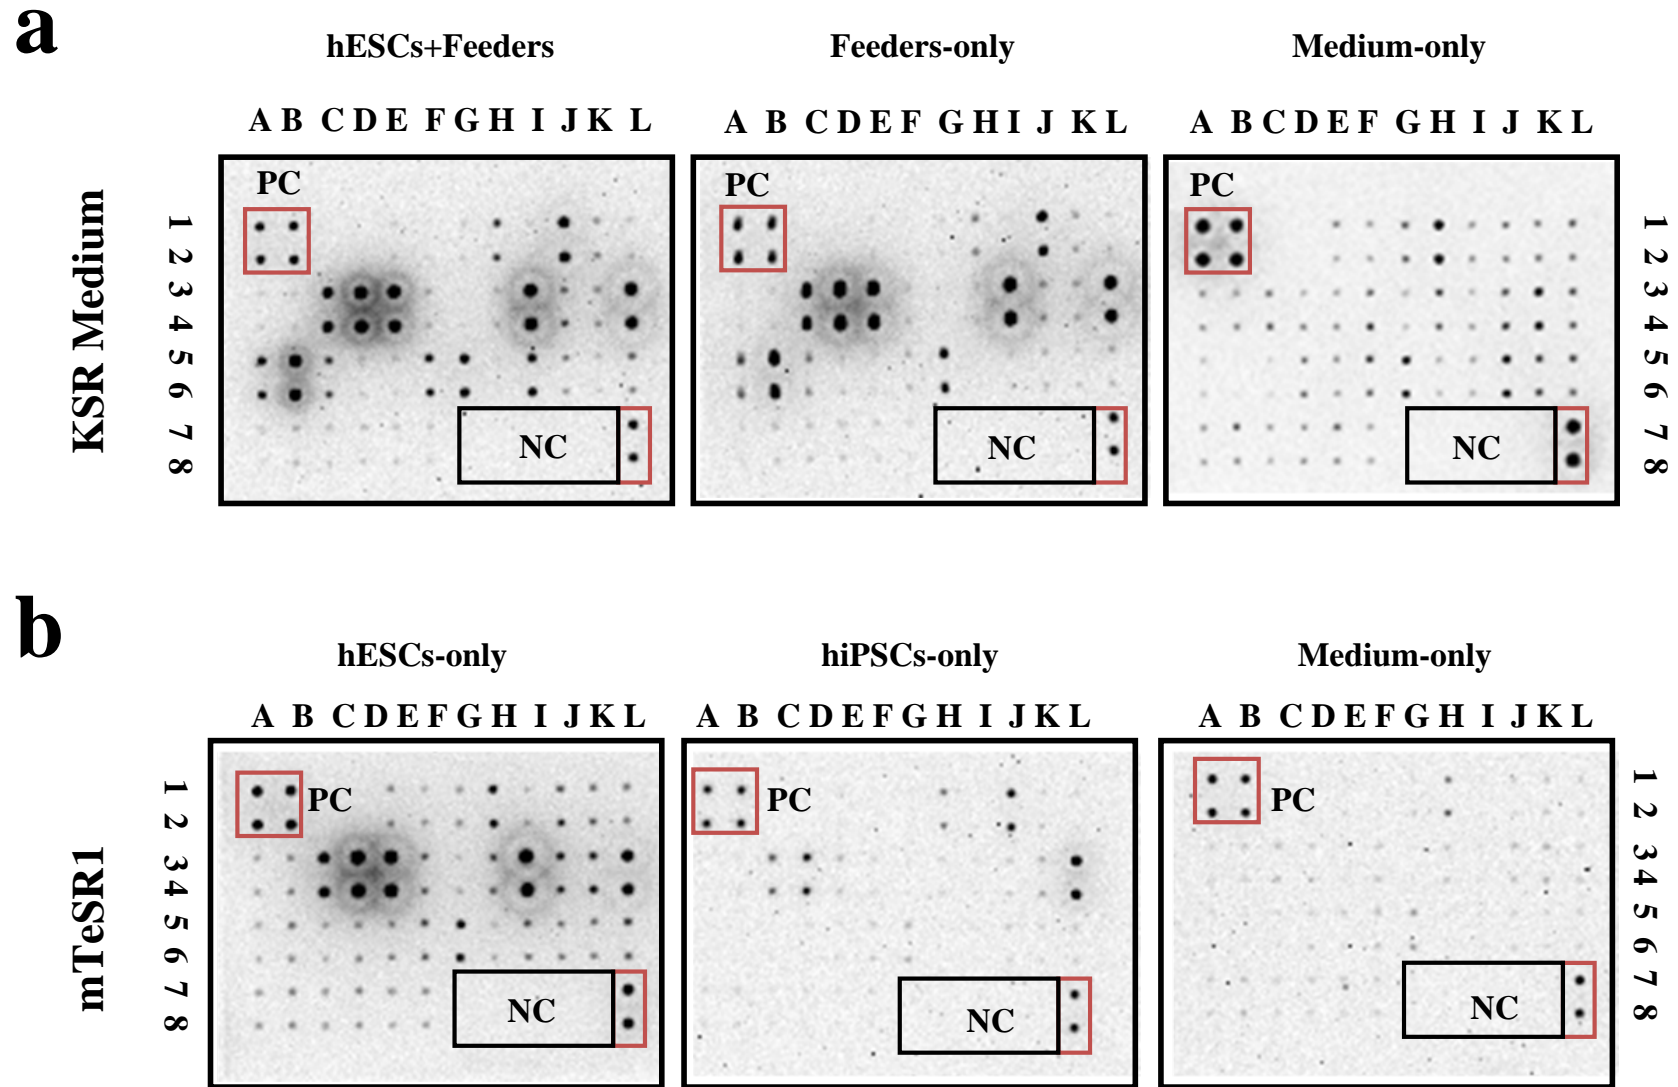

**Figure S8. Signal intensities of chemokines in protein arrays. (a-b)** Chemokines from six different supernatants were evaluated. KSR medium (**a**); mTeSR1 medium (**b**); Positive controls (PCs); Negative controls (NCs). Relative signal intensity (RSI) was defined as per the normalized grey intensities listed in Table 1.

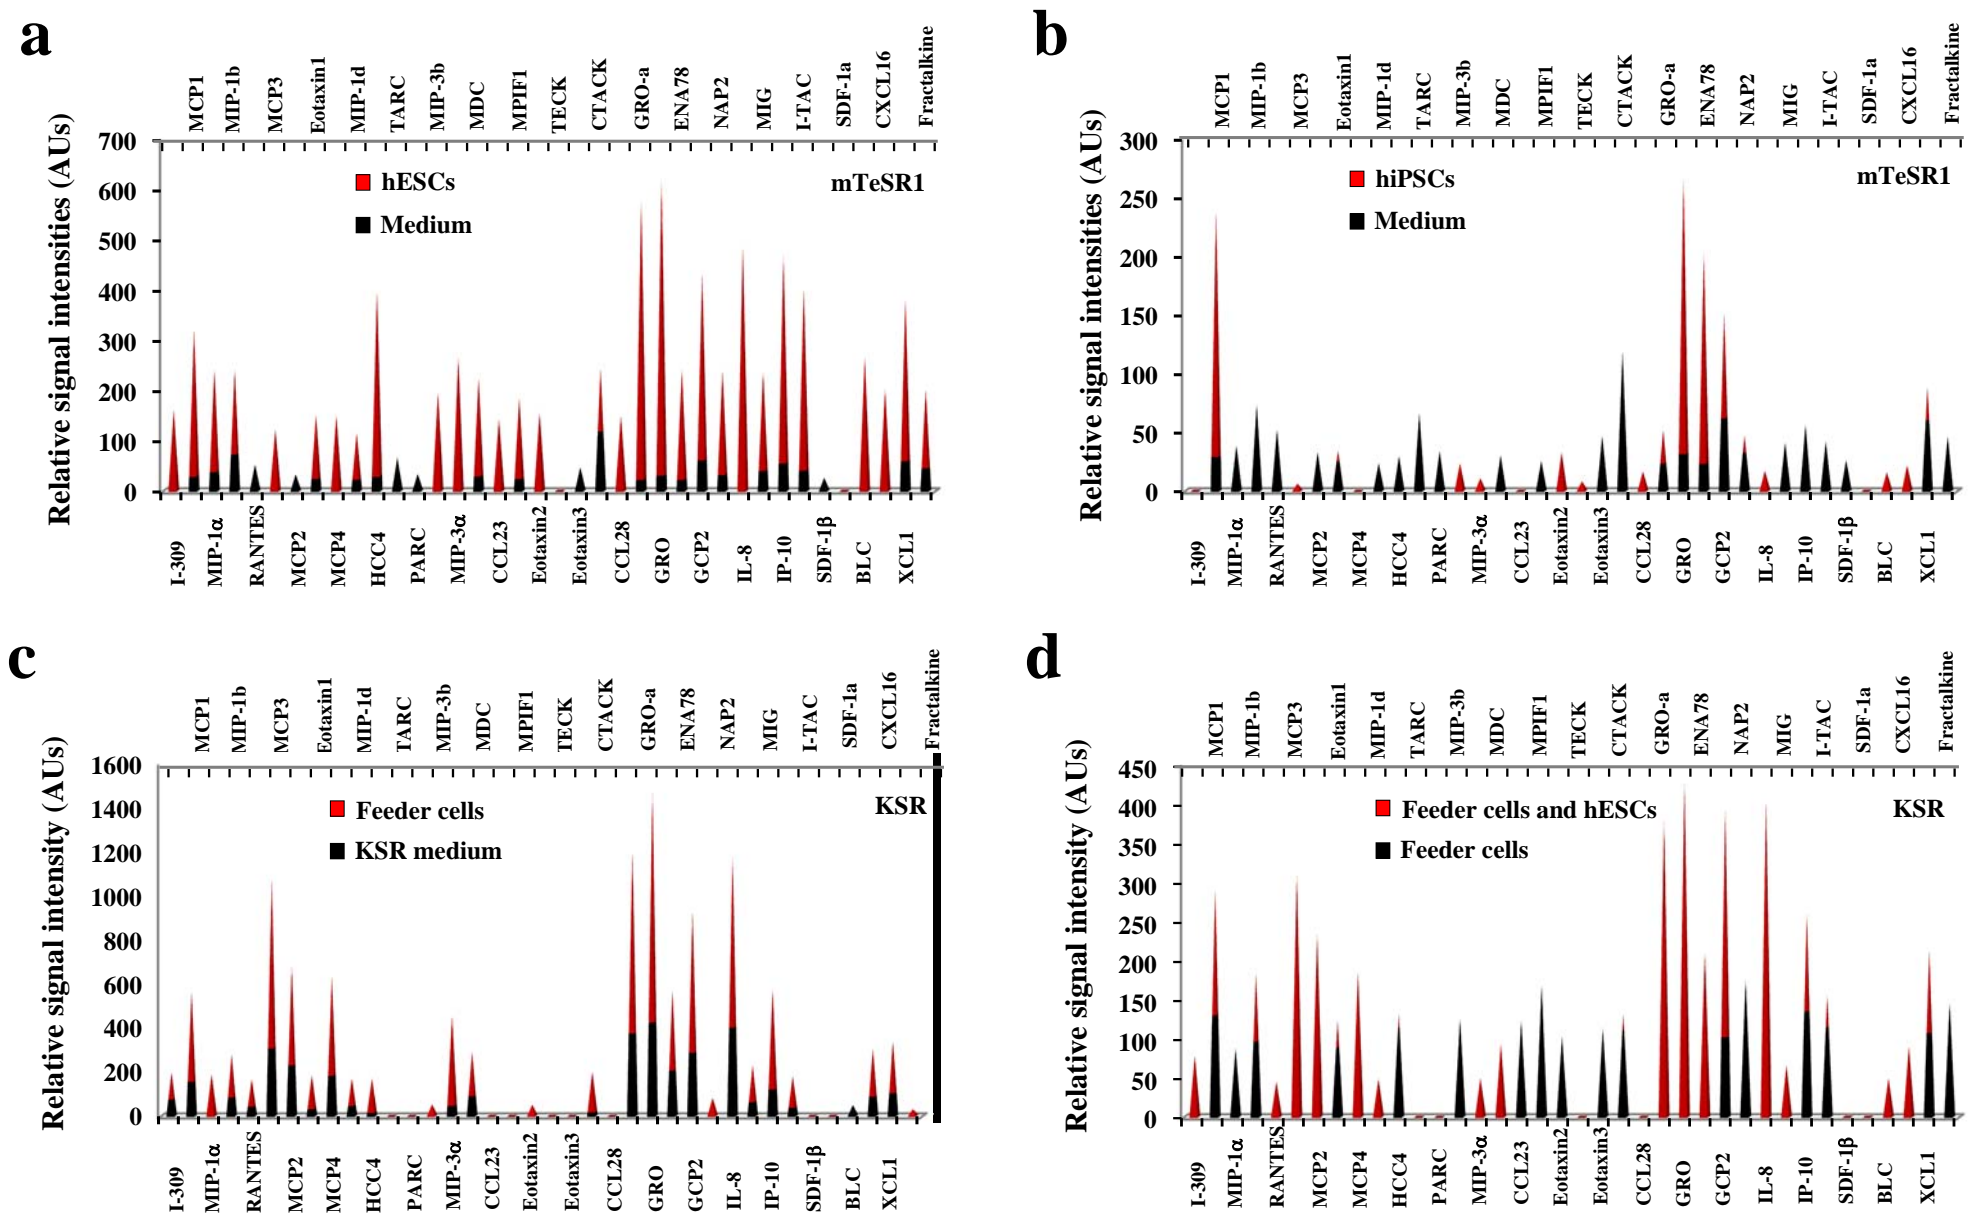

**Figure S9. Comparison of chemokine secretion of hPSCs under different conditions.** hESCs vs mTeSR1 medium (a); hiPSCs vs mTeSR1 medium (b); Feeder cells vs KSR medium (c); and Feeder cells/hESCs vs KSR medium (d). AUs, arbitrary units.

**a**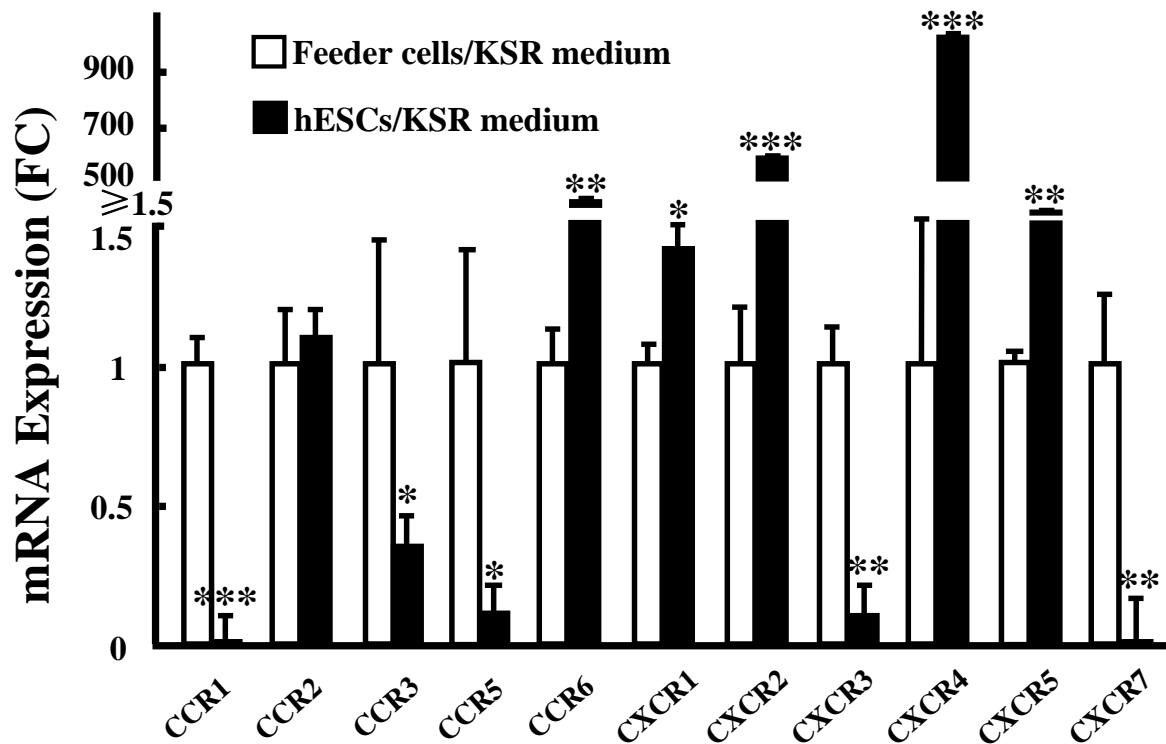**b**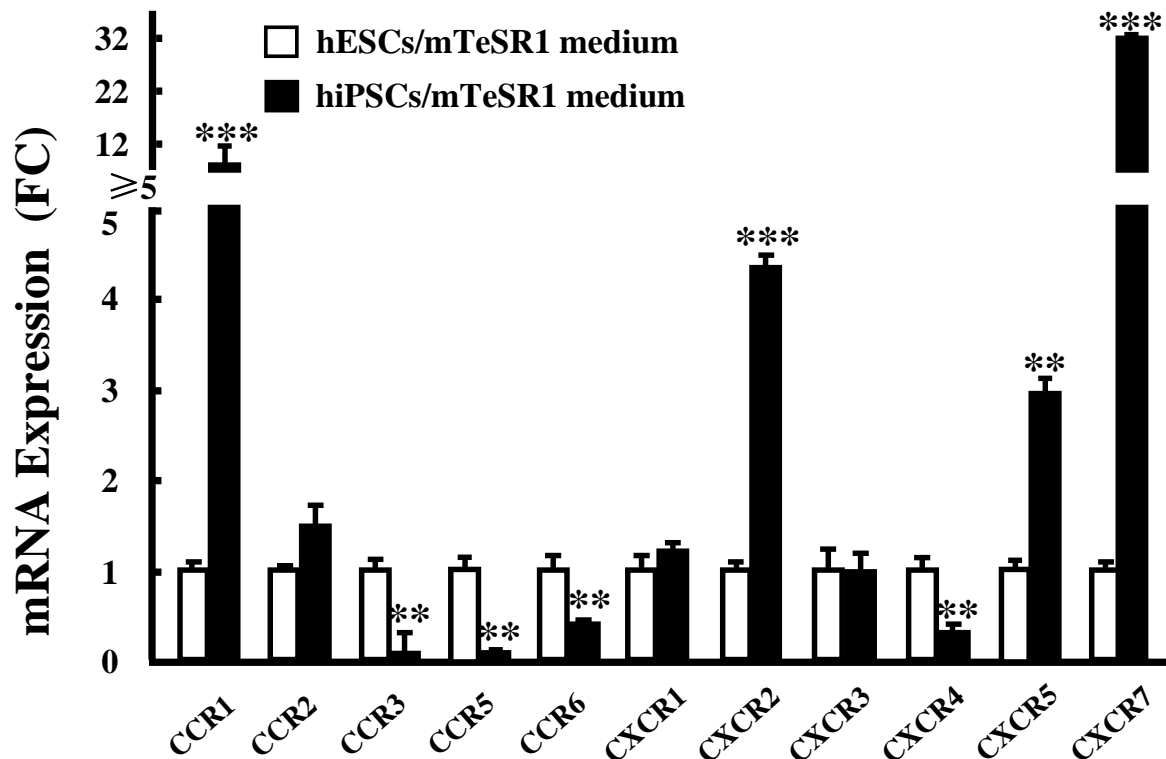

**Figure S10. mRNA expression of CC/CXC chemokine receptors in hPSCs.**

(a) Feeder cells vs hESCs in KSR medium; (b) hESCs vs hiPSCs in mTeSR1 medium. Values on graphs represent means  $\pm$  sem; FC, fold change; n = 3 individual experiments. \*P < 0.05, \*\*P < 0.01, \*\*\*P < 0.001.

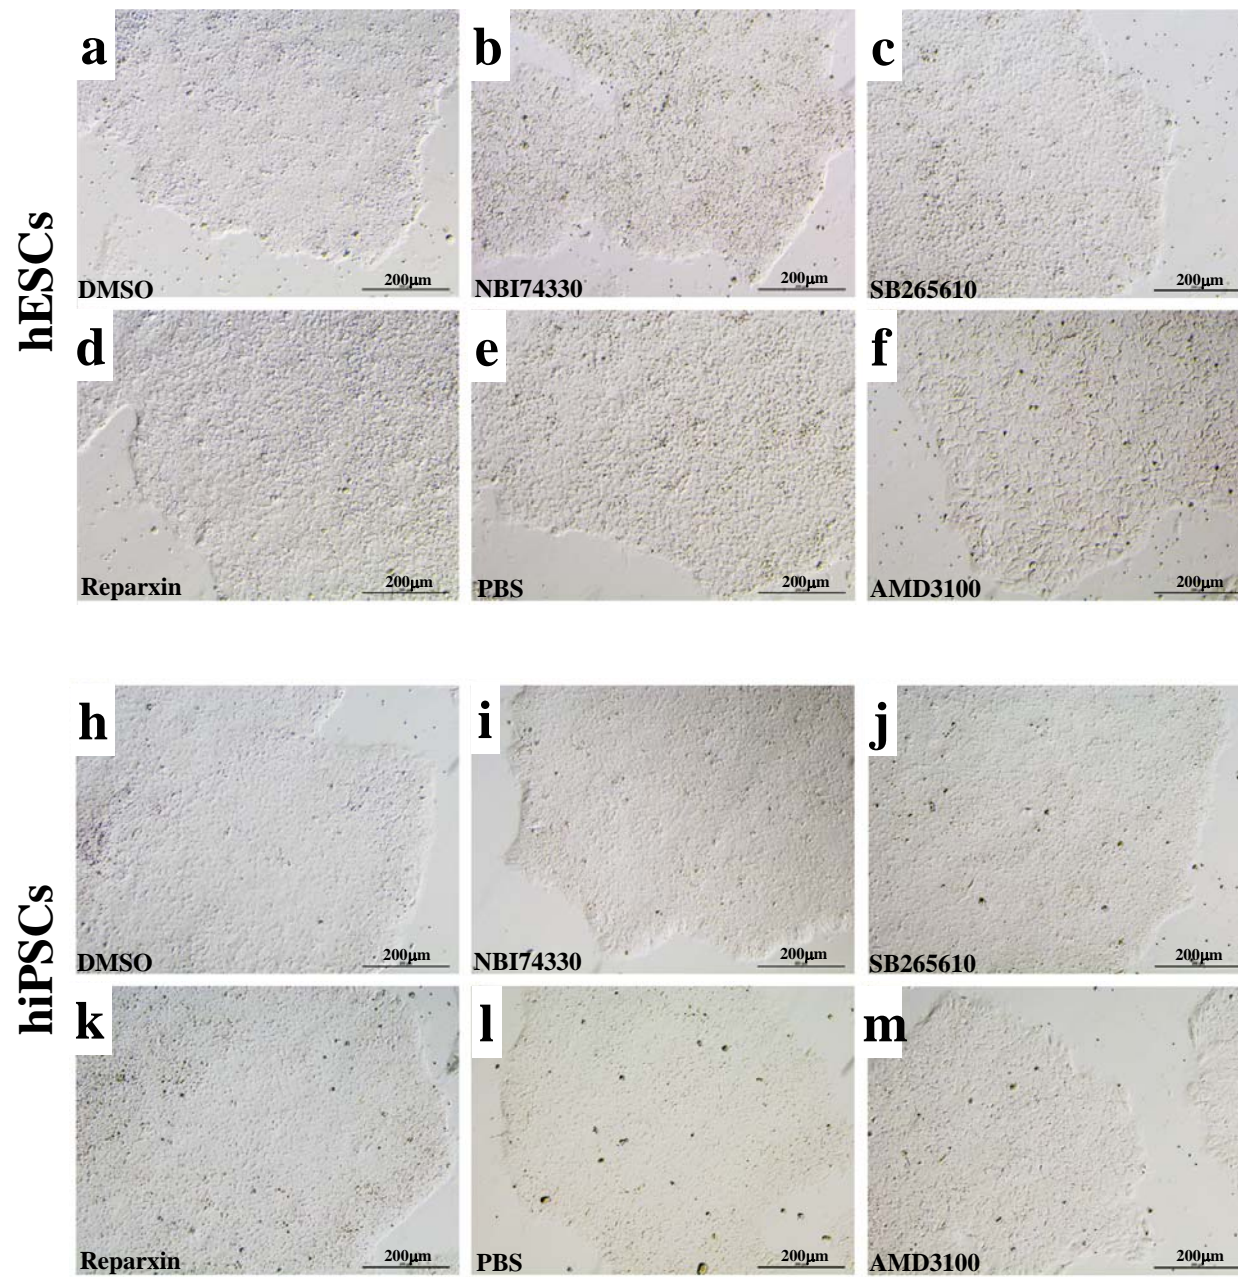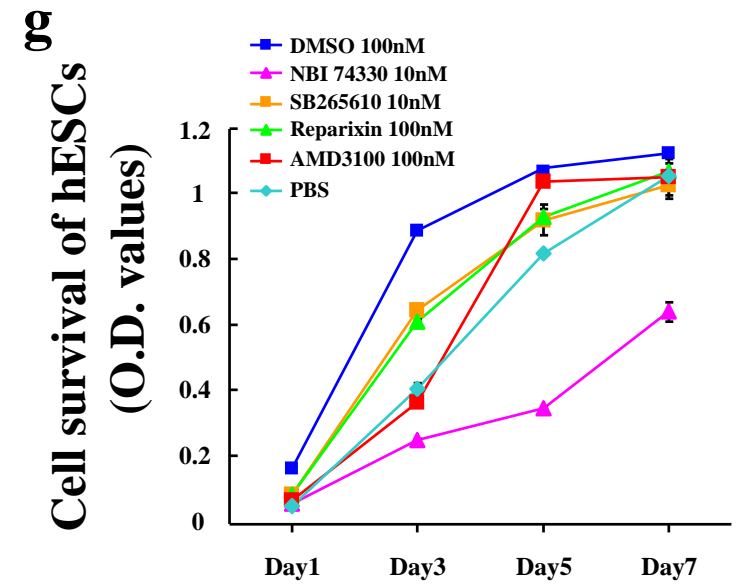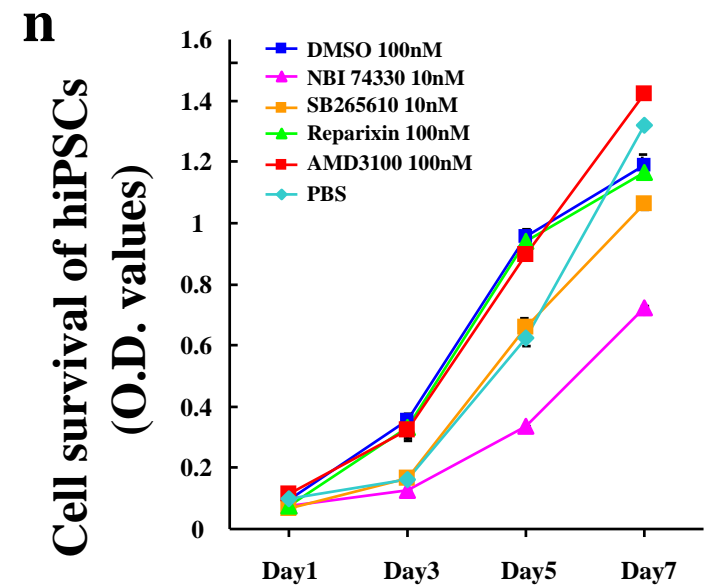

**Figure S11. Effects of antagonists on both hPSCs and hiPSCs.** (a-f, h-m) Phase microscope images of hPSCs treated with several receptor-specific antagonists for 7 d. hPSCs (a-f); hiPSCs (h-m). Scale bar, 200 μm. (g, n) MTT assay of hPSC survival and toxicity responses to receptor-specific antagonists. hPSCs (g); hiPSCs (n).

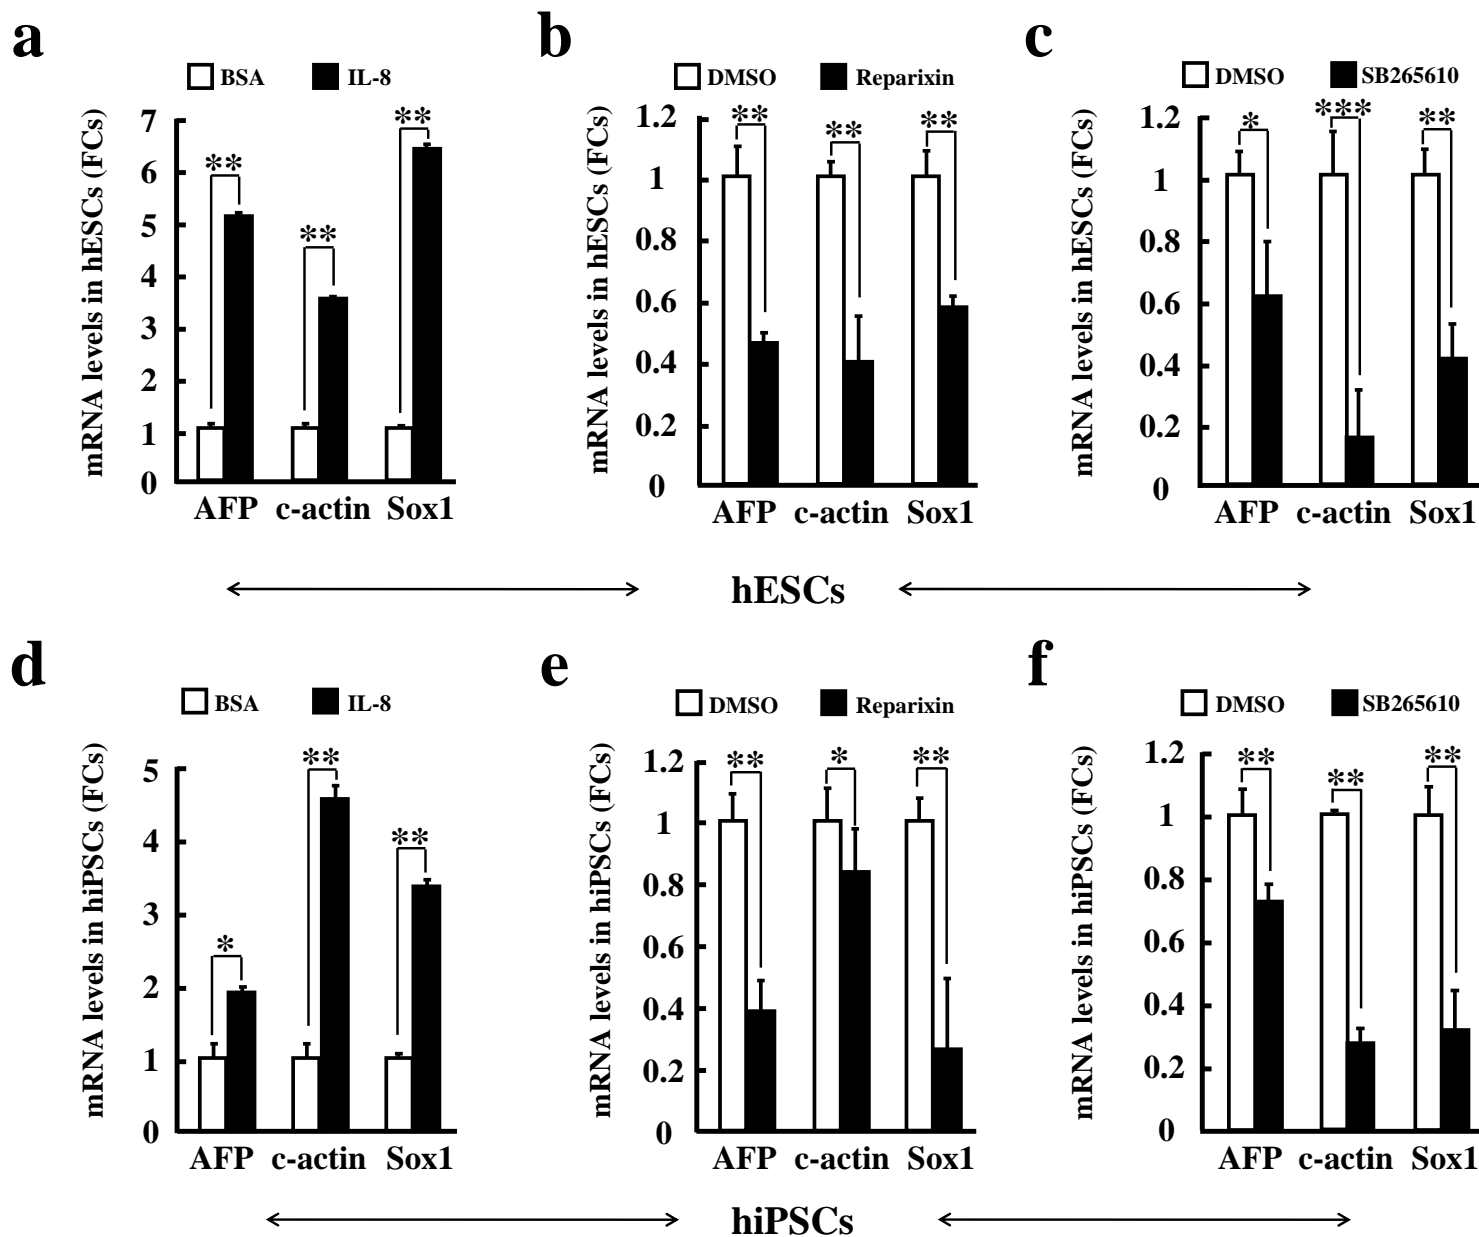

**Figure S12. Chemokine IL-8 signaling in the *in vitro* differentiation of hESCs and hiPSCs.** Differentiation of hESCs (a-c) and hiPSCs (d-f) was evaluated by the expressions of three germ genes (*AFP*, *c-actin*, and *Sox1*) after treatment with IL-8 and CXCR2 antagonists reparixin/SB265610. hESCs (a-c); hiPSCs (d-f); IL-8 (a, d); Reparixin (b, e); and SB265610 (c, f). Values on graphs represent means  $\pm$  sem,  $n \geq 3$  individual experiments. \* $P < 0.05$ , \*\* $P < 0.01$ , \*\*\* $P < 0.001$ .

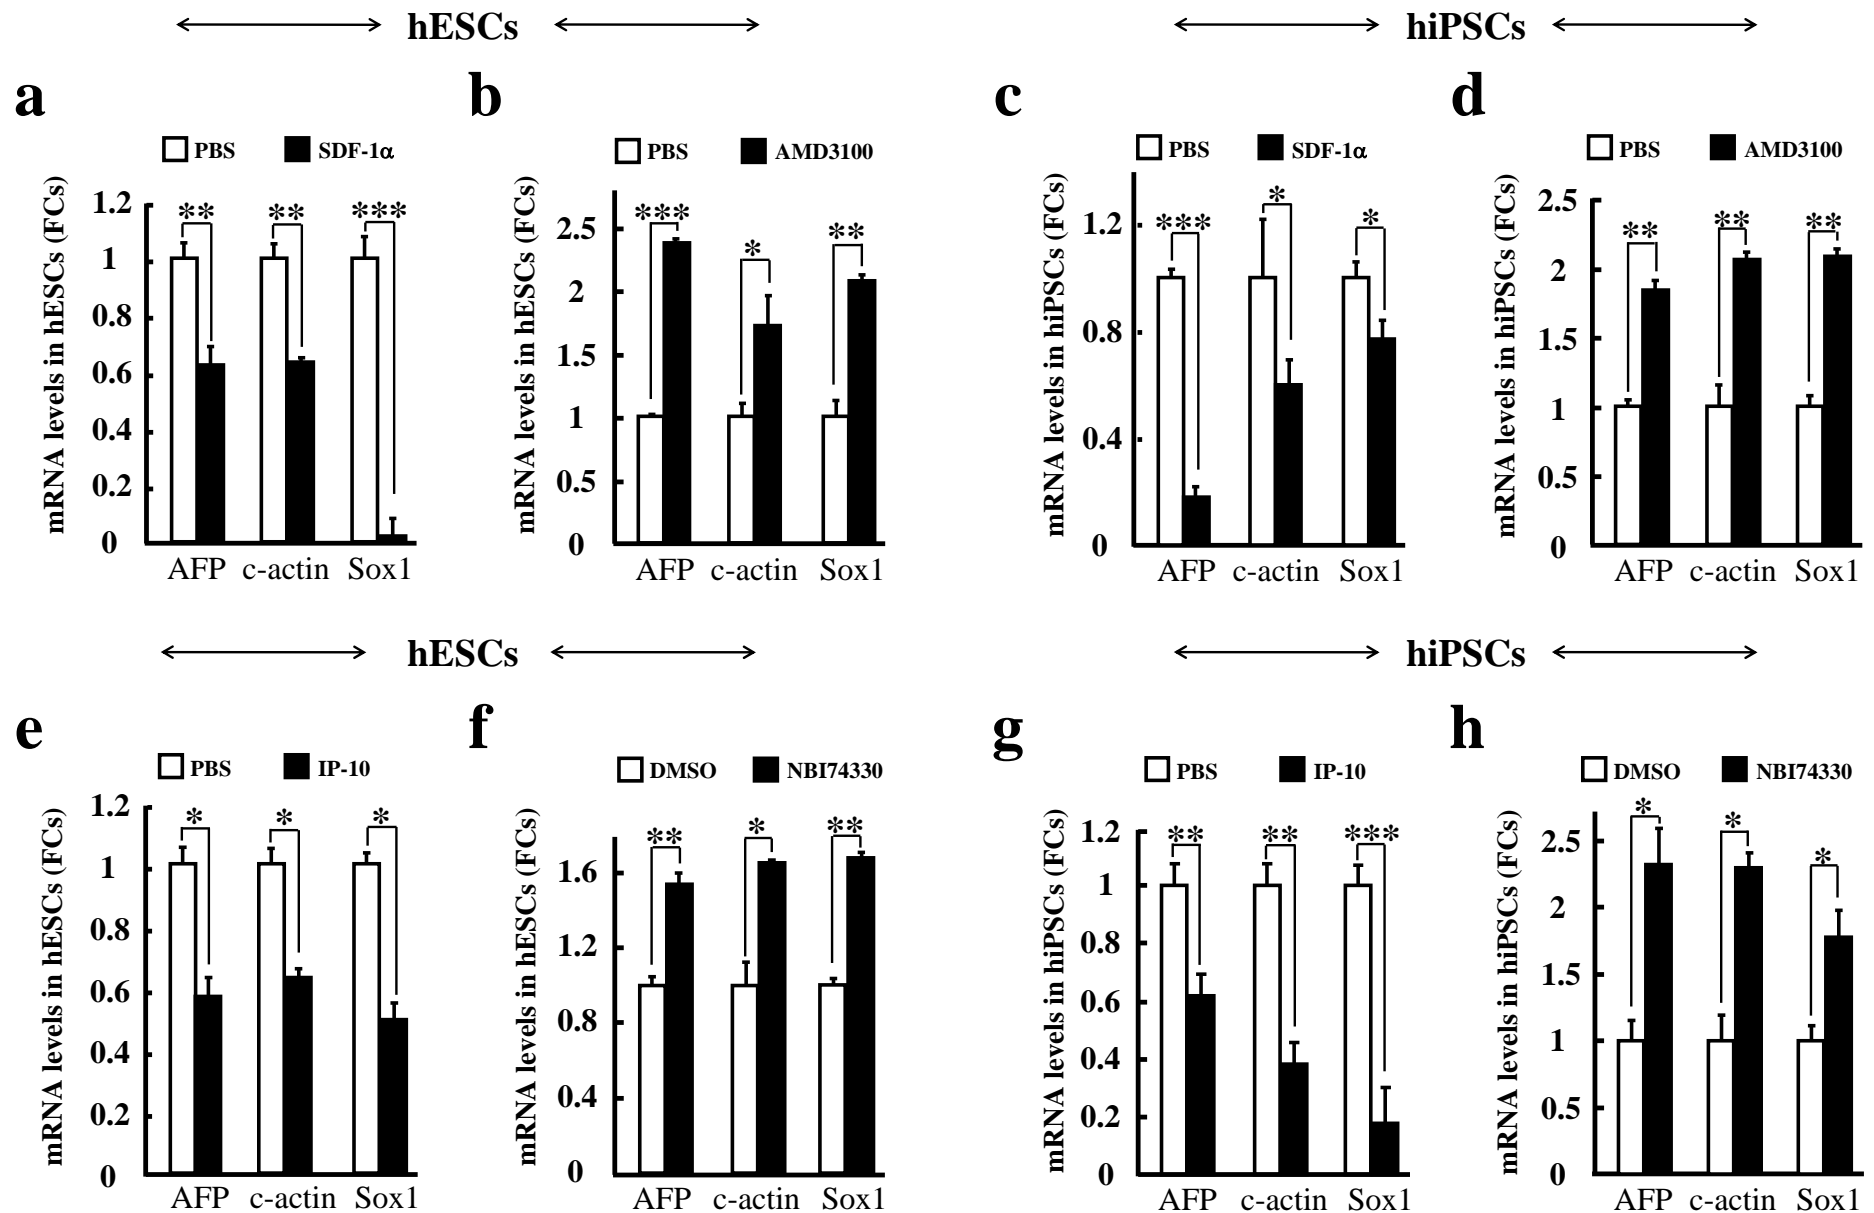

**Figure S13. Chemokines SDF-1a and IP-10 in the *in vitro* differentiation of hESCs and hiPSCs.** Differentiation of hiPSCs was evaluated by the expressions of three germ genes (*AFP*, *c-actin*, and *Sox1*) after treatment with AMD3100/NBI 74330. hESCs (a, b, e, f); hiPSCs (c, d, g, h); SDF-1a (a, c); CXCR4 antagonist AMD3100 (b, d); IP-10 (e, g); and CXCR3 antagonist NBI74330 (f, h). Values on graphs represent means  $\pm$  sem,  $n \geq 3$  individual experiments. \* $P < 0.05$ , \*\* $P < 0.01$ , \*\*\* $P < 0.001$ .

## Supplementary table 1.

### Oligo primers of chemokine receptors and transcription factors.

| Name                         | Sequence                    |
|------------------------------|-----------------------------|
| <b>Chemokine receptors</b>   |                             |
| CCR1 forward                 | 5'-GGCTGGTATTGCCTTTGTTG-3'  |
| CCR1 reverse                 | 5'-GGTCCAAATGTCTGCTCTGC-3'  |
| CCR2 forward                 | 5'-ACGGTGCTCCCTGTCATAAA-3'  |
| CCR2 reverse                 | 5'-CATTCCCAAAGACCCACTCAT-3' |
| CCR3 forward                 | 5'-CTGTCTCGTTCTCCCTCTGCT-3' |
| CCR3 reverse                 | 5'-GCTCCGCTCACAGTCATTTTC-3' |
| CCR5 forward                 | 5'-GGGGTGGTGACAAGTGTGAT-3'  |
| CCR5 reverse                 | 5'-GATGATTCCTGGGAGAGACG-3'  |
| CCR6 forward                 | 5'-AGGCAGTTCTCCAGGCTATTT-3' |
| CCR6 reverse                 | 5'-GGCATTGCTGAAAACCCAC-3'   |
| CXCR1 forward                | 5'-CCAGTCCAGTTTGCTATGAGG-3' |
| CXCR1 reverse                | 5'-AGCAGGACCAGGTTGTAGGG-3'  |
| CXCR2 forward                | 5'-ACCTACTCTTTGCCCTGACCT-3' |
| CXCR2 reverse                | 5'-ACAGACCCCAGATGCTGAGAC-3' |
| CXCR3 forward                | 5'-ATCAACTTCTACGCAGGAGCC-3' |
| CXCR3 reverse                | 5'-AGGAAGATGAAGTCTGGGAGG-3' |
| CXCR4 forward                | 5'-TCTTTGTCATCACGCTTCCC-3'  |
| CXCR4 reverse                | 5'-CGCCAACATAGACCACCTTT-3'  |
| CXCR5 forward                | 5'-TGGGAACTGGACAGATTGGA-3'  |
| CXCR5 reverse                | 5'-GTCTCCGTGGAACTGCGTGT-3'  |
| CXCR7 forward                | 5'-CTTCCTTGTCTGCTGGTTGC-3'  |
| CXCR7 reverse                | 5'-GCTTGGTGAGCCCTGTTTT-3'   |
| <b>Transcription Factors</b> |                             |
| Oct4 forward                 | 5'- AGCGACTATGCACAACGA-3'   |
| Oct4 reverse                 | 5'- AGTGGTGACGGAGACAGG-3'   |
| Nanog forward                | 5'-ACCTATGCCTGTGATTTGTGG-3' |
| Nanog reverse                | 5'-CGGGACCTTGTCTTCCTTTT-3'  |
| Rex-1 forward                | 5'-ATGGCGTCCAAGACTACCAC-3'  |
| Rex-1 reverse                | 5'-ACTTTGCCCCCAAACCTCTTT-3' |

### **Three germ layer genes**

|                         |                              |
|-------------------------|------------------------------|
| AFP forward             | 5'-AGCGGCTGACATTATTATCG-3'   |
| AFP reverse             | 5'-GCAGGAGGGACATATGTTTC-3'   |
| GATA4 forward           | 5'-GCCAGTCTACGTGCCACACA-3'   |
| GATA4 reverse           | 5'-GGGTGTAAGCGGCTCCGTC-3'    |
| GATA6 forward           | 5'-TCCACTCGTGTCTGCTTTTG-3'   |
| GATA6 reverse           | 5'-CCCTTCCCTTCCATCTTCTC-3'   |
| Sox17 forward           | 5'-CCTGGGTTTTTGTGTTGCT-3'    |
| Sox17 reverse           | 5'-GAGGAAGCTGTTTTGGGACA-3'   |
| FOXA2 forward           | 5'-CTACGCCAACATGAACTCCA-3'   |
| FOXA2 reverse           | 5'-CGGTAGAAGGGGAAGAGGTC-3'   |
| Brachyury T (T) forward | 5'-ACCCAGTTCATAGCGGTGAC-3'   |
| Brachyury T (T) reverse | 5'-ATGAGGATTTGCAGGTGGAC-3'   |
| MIXL1 forward           | 5'-GGTACCCCGACATCCACTT-3'    |
| MIXL1 reverse           | 5'-GCCTGTTCTGGAACCATACCT-3'  |
| TBX1 forward            | 5'-CGCCGGTGAAGAAGAACG-3'     |
| TBX1 reverse            | 5'-CACTTGGAAGGTGGGAAACA-3'   |
| c-actin forward         | 5'-TGTGCTAGACAGGAACTCAGAT-3' |
| c-actin reverse         | 5'-GATGAGTCCAGAGTACTCCAAA-3' |
| Nestin forward          | 5'-AACAGCGACGGAGGTCTCTA-3'   |
| Nestin reverse          | 5'-TTCTCTTGTCCTCCGCAGACTT-3' |
| Sox1 forward            | 5'-GGACTCTCTCTGAGGTTCTTTG-3' |
| Sox1 reverse            | 5'-GGCCCACATCCTAATCTTGA-3'   |
| NeuroD1 forward         | 5'-ATCTTGCACAGGGAGTCACC-3'   |
| NeuroD1 reverse         | 5'-TACTGCCGTCCAGTCCCATA-3'   |
| Pax6 forward            | 5'-GCTCGGTGGTGTCTTTGTCA-3'   |
| Pax6 reverse            | 5'-CAGAATTCGGGAAATGTTCGC-3'  |
| <b>Control</b>          |                              |
| 18S RNA forward         | 5'-CAGCCACCCGAGATTGAGCA-3'   |
| 18S RNA reverse         | 5'-TAGTAGCGACGGGCGGTGTG-3'   |

---
